# Supplementary material for: Au nanoparticle grafted thiol modified magnetic nanoparticle solid phase extraction coupled with high performance liquid chromatography for determination of steroid hormones in human plasma and urine
Source: Royal Society of Chemistry journal article supplement (doi:10.1039/c3ay41684d), 2013-12-20
Supplement: c3ay41684d.pdf [file c3ay41684d.pdf]

## Supplementary information:

Fig. S1 UV-Vis spectrum of the prepared colloidal Au NPs.

Fig. S2 XRD pattern of the TMSPT-MNPs.

Fig. S3 Effect of Sample volume on the recovery of the steroids. pH; 9, amount of adsorbent; 50 mg, amount of CTAB; 10 mg, analyte concentration; 20 ng mL<sup>-1</sup>.

Fig. S4 Effect of adsorbent amount on the recovery of the analytes. pH; 9, sample volume; 50 mL, steroids concentration; 20 ng mL<sup>-1</sup>.

Fig. S5 Effect of ionic strength on the recovery of the steroids. Sample volume; 50 mL, analyte concentration; 20 ng mL<sup>-1</sup>, pH; 9, amount of adsorbents; 50 mg, amount of CTAB; 10 mg.

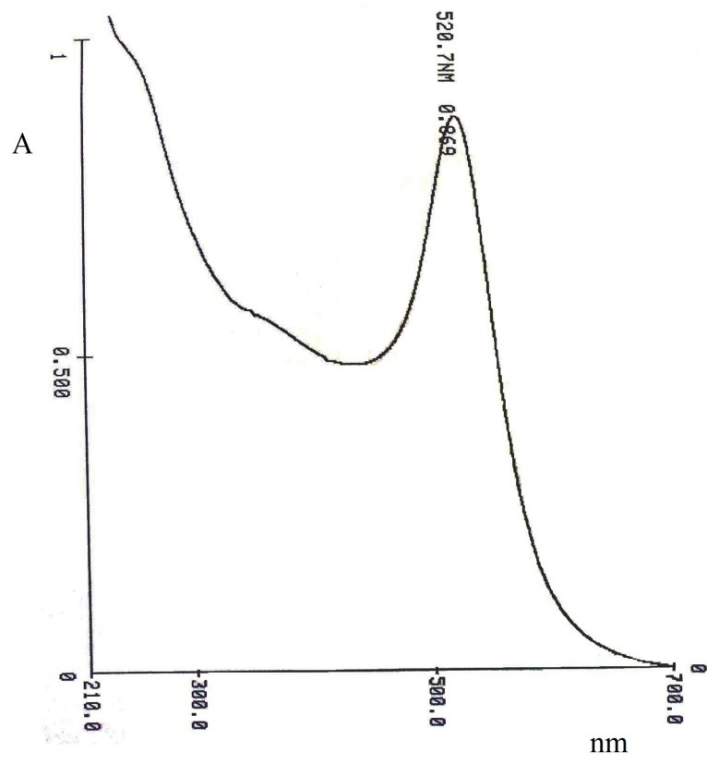

Fig. S1 UV-Vis spectrum of the prepared colloidal Au NPs.

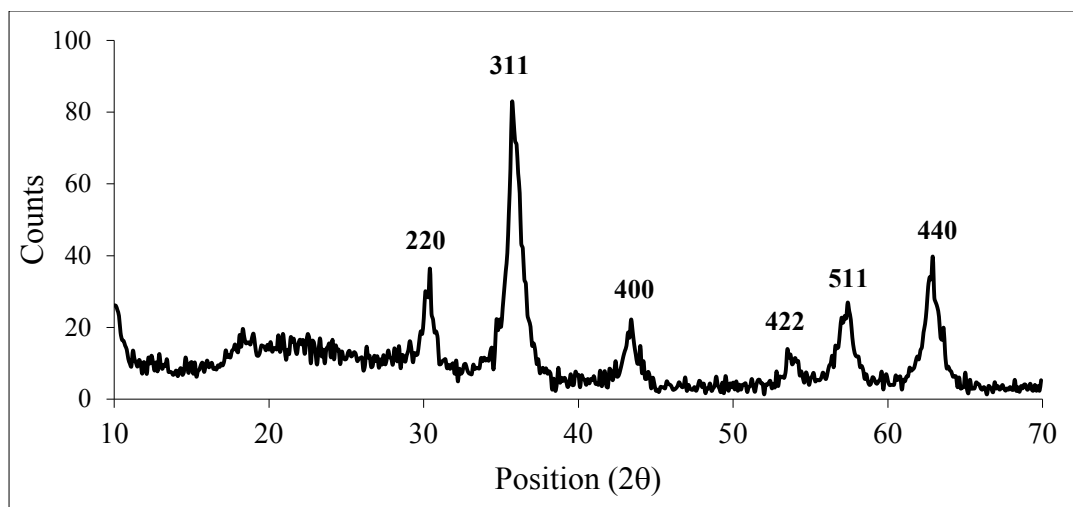

Fig. S2 XRD pattern of the TMSPT-MNPs.

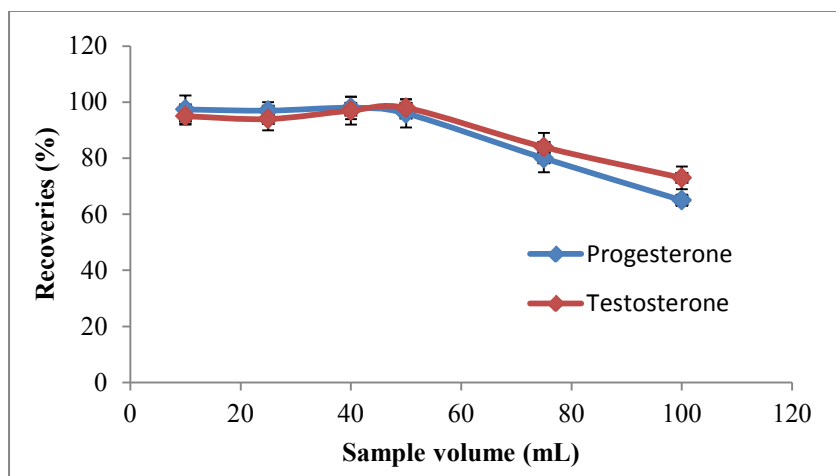

Fig. S3 Effect of Sample volume on the recovery of the steroids. pH; 9, amount of adsorbent; 50 mg, amount of CTAB; 10 mg, analyte concentration; 20 ng mL<sup>-1</sup>.

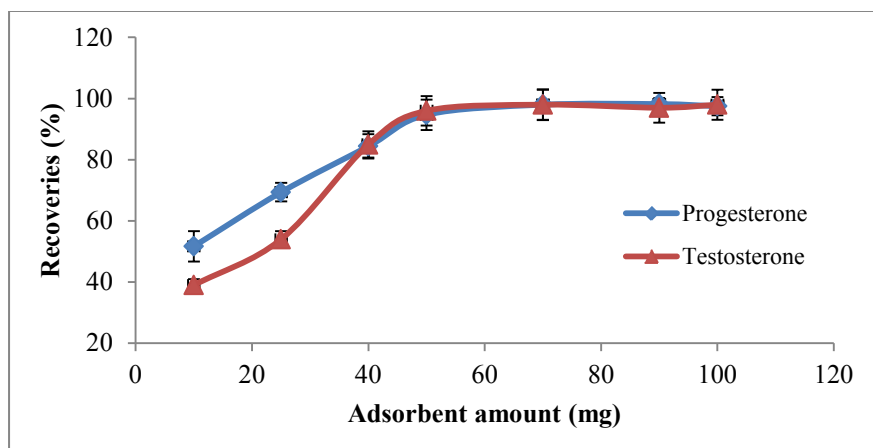

Fig. S4 Effect of adsorbent amount on the recovery of the analytes. pH; 9, sample volume; 50 mL, steroids concentration; 20 ng mL<sup>-1</sup>.

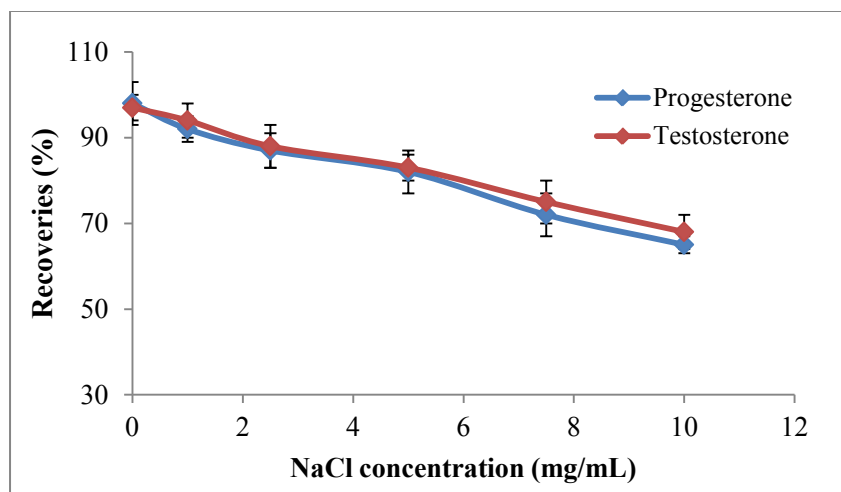

Fig. S5 Effect of ionic strength on the recovery of the steroids. Sample volume; 50 mL, analyte concentration; 20 ng mL<sup>-1</sup>, pH; 9, amount of adsorbents; 50 mg, amount of CTAB; 10 mg.
